# Supplementary material
Source: PubMed Central journal article supplement (PMC2148283)
Supplement: pnas_0709971104_5.pdf [file pnas_0709971104_5.pdf]

**Table 2.** Direct, potential and non-specific targets of miR-124a, classified based on assays in Supplementary Figure 2.

| <b>GENE</b>              | <b>MOUSE<br/>ACCESSION</b> | <b>NAME</b>                                                                                                                          |
|--------------------------|----------------------------|--------------------------------------------------------------------------------------------------------------------------------------|
| <b>DIRECT TARGETS</b>    |                            |                                                                                                                                      |
| Ctdsp1                   | NM_153088                  | RNA polII C-terminal domain small phosphatase 1                                                                                      |
| Vamp3                    | NM_009498                  | Vesicle-associated membrane protein 3                                                                                                |
| Fcho2                    | NM_172591                  | FCH domain only 2                                                                                                                    |
| Ptbp1                    | NM_008956                  | Polypyrimidine tract binding protein 1                                                                                               |
| Cd164                    | NM_016898                  | Cd164 antigen (sialomucin)                                                                                                           |
| Lamc1                    | NM_010683                  | Laminin gamma 1                                                                                                                      |
| Cebpa                    | NM_007678                  | CCAAT/enhancer binding protein (C/EBP), alpha                                                                                        |
| Tom11                    | BC004710                   | Target of myb1-like 1                                                                                                                |
| Arfp1                    | XM_130985                  | Arfaptin-1 (ADP-ribosylation factor-interacting protein 1)                                                                           |
| Sypl                     | NM_198710                  | Synaptophysin-like                                                                                                                   |
| Hadhb                    | NM_145558                  | Hydroxyacyl-Coenzyme A dehydrogenase/3-ketoacyl-Coenzyme A thiolase/enoyl-Coenzyme A hydratase (trifunctional protein), beta subunit |
| B4galt1                  | NM_022305                  | UDP-Gal:betaGlcNAc beta 1,4- galactosyltransferase, polypeptide 1                                                                    |
| Epim                     | NM_007941                  | Epimorphin                                                                                                                           |
| C6orf72                  | NM_145418                  | BC013529 (hypothetical protein LOC215751)                                                                                            |
| Mapk14                   | NM_011951                  | Mitogen activated protein kinase 14                                                                                                  |
| Plod3                    | NM_011962                  | Procollagen-lysine, 2-oxoglutarate 5-dioxygenase 3 (lysyl hydrolase)                                                                 |
| Itgb1                    | NM_010578                  | Integrin beta 1 (fibronectin receptor beta)                                                                                          |
| Ptpn12                   | NM_011203                  | Protein tyrosine phosphatase, non-receptor type 12                                                                                   |
| Lass2                    | NM_029789                  | Longevity assurance homolog 2                                                                                                        |
| Nek9                     | NM_145138                  | NIMA (never in mitosis gene a)-related expressed kinase 9                                                                            |
| E2ig4                    | NM_001024619               | Leucine rich repeat containing 54                                                                                                    |
| Ctdsp2                   | NM_146012                  | RNA polII C-terminal domain small phosphatase 2                                                                                      |
| <b>POTENTIAL TARGETS</b> |                            |                                                                                                                                      |
| Cdc14b                   | NM_172587                  | CDC14 cell division cycle 14 homolog B                                                                                               |
| Mphosph9                 | XM_893274                  | M-phase phosphoprotein 9                                                                                                             |
| Depdc1                   | NM_029523                  | DEP domain containing 1a                                                                                                             |
| Parp16                   | NM_177460                  | Poly (ADP-ribose) polymerase family, member 16                                                                                       |
| FLJ11259                 | NM_027878                  | 1200002N14Rik                                                                                                                        |
| Hebp2                    | NM_019487                  | Heme binding protein 2                                                                                                               |
| Iqgap1                   | NM_016721                  | IQ motif containing GTPase activating protein 1                                                                                      |
| Papss2                   | NM_011864                  | 3'-phosphoadenosine 5'-phosphosulfate synthase 2                                                                                     |
| THG-1                    | NM_023910                  | TSC22 domain family 4 (Tsc22d4)                                                                                                      |
| Gcl                      | NM_011818                  | Germ cell-less homolog                                                                                                               |
| Slc30a7                  | NM_023214                  | Solute carrier family 30 (zinc transporter), member 7                                                                                |
| Serp1                    | NM_030685                  | Stress-associated endoplasmic reticulum protein 1 (D3Ucl1)                                                                           |
| MGC17943                 | NM_001013028               | Expressed sequence AI597468                                                                                                          |
| Chsy1                    | XM_194358                  | Carbohydrate (chondroitin) synthase 1                                                                                                |
| Ct120                    | XM_282971                  | 2310047D13Rik                                                                                                                        |
| Atp6v0e                  | NM_025272                  | ATPase, H+ transporting, V0 subunit                                                                                                  |
| Rarg                     | NM_011244                  | Retinoic acid receptor, gamma                                                                                                        |
| Hadhsc                   | NM_008212                  | L-3-hydroxyacyl-Coenzyme A dehydrogenase, short chain                                                                                |
| Myh9                     | NM_022410                  | Myosin, heavy polypeptide 9, non-muscle                                                                                              |
| Abhd5                    | NM_026179                  | Abhydrolase domain containing 5                                                                                                      |
| Litaf                    | NM_019980                  | LPS-induced TN factor                                                                                                                |
| Slc16a1                  | NM_009196                  | Solute carrier family 16 (monocarboxylic acid transporters), member 1                                                                |

|          |              |                                                                                                      |
|----------|--------------|------------------------------------------------------------------------------------------------------|
| Aldh9a1  | NM_019993    | Aldehyde dehydrogenase 9, subfamily A1                                                               |
| Pgrmc2   | XM_130859    | Progesterone receptor membrane component 2                                                           |
| Tead1    | NM_009346    | TEA domain family member 1                                                                           |
| Cav1     | NM_007616    | Caveolin 1                                                                                           |
| Plp2     | NM_019755    | Proteolipid protein 2                                                                                |
| Man2a1   | NM_008549    | Mannosidase 2, alpha 1                                                                               |
| Ryk      | NM_013649    | Receptor-like tyrosine kinase                                                                        |
| Acaa2    | NM_177470    | Acetyl-Coenzyme A acyltransferase 2 (mitochondrial 3-oxoacyl-Coenzyme A thiolase)                    |
| Kiaa1102 | BC042189     | 3732412D22Rik                                                                                        |
| Ahr      | NM_013464    | Aryl-hydrocarbon receptor                                                                            |
| Peci     | NM_011868    | Peroxisomal delta3, delta2-enoyl-Coenzyme A isomerase                                                |
| C14orf32 | NM_178684    | C130032J12Rik                                                                                        |
| Dvl2     | NM_007888    | Dishevelled 2, dsh homolog                                                                           |
| Ak2      | NM_016895    | Adenylate kinase 2                                                                                   |
| Trip11   | XM_127084    | Thyroid hormone receptor interactor 11                                                               |
| Cdk4     | NM_009870    | Cyclin-dependent kinase 4                                                                            |
| Chp      | NM_019769    | Calcium-binding protein p22 (Calcium-binding protein CHP) (Calcineurin homologous protein) (Sid 470) |
| Rela     | NM_009045    | v-rel reticuloendotheliosis viral oncogene homolog A (avian)                                         |
| Nme4     | NM_019731    | Expressed in non-metastatic cells 4                                                                  |
| Podxl    | NM_013723    | Podocalyxin-like                                                                                     |
| C9orf88  | NM_146119    | 9130404D14Rik; Niban-like protein                                                                    |
| Slc22a5  | NM_011396    | Solute carrier family 22 (organic cation transporter), member 5                                      |
| MGC5508  | NM_134142    | 1110006115Rik (hypothetical protein LOC68539); TMEM109                                               |
| Kis      | NM_010633    | U2AF homology motif (UHM) kinase 1 (UHMK1)                                                           |
| Slc25a30 | NM_026232    | Solute carrier family 25, member 30                                                                  |
| Spc18    | NM_019951    | Sec11-like 1                                                                                         |
| Mad2l2   | NM_027985    | MAD2 mitotic arrest deficient-like 2                                                                 |
| Slc17a5  | NM_172773    | Solute carrier family 17 (anion/sugar transporter), member 5                                         |
| FLJ46072 | NM_134087    | Expressed sequence AA409316                                                                          |
| FLJ10099 | XM_355643    | 0610007L01Rik (BC033455)                                                                             |
| Tnfrsf21 | NM_178589    | Tumor necrosis factor receptor superfamily, member 21                                                |
| Dnm2     | NM_001039520 | Dynamin 2                                                                                            |
| Syngn2   | NM_009304    | Synaptogyrin 2                                                                                       |
| Btg3     | NM_009770    | B-cell translocation gene 3                                                                          |
| Rnpepl1  | NM_181405    | Arginyl aminopeptidase (aminopeptidase B)-like 1                                                     |
| Lrrc1    | NM_172528    | Leucine rich repeat containing 1                                                                     |
| G3bp     | NM_013716    | Ras-GTPase-activating protein SH3-domain binding protein                                             |
| Pttg1p   | NM_145925    | Pituitary tumor-transforming 1 interacting protein                                                   |
| Tln1     | NM_011602    | Talin 1                                                                                              |
| FLJ20847 | NM_181403    | Vacuolar protein sorting 37C                                                                         |

## NON-SPECIFIC TARGETS

|          |              |                                                                |
|----------|--------------|----------------------------------------------------------------|
| RAI      | NM_001010836 | Protein phosphatase 1, regulatory (inhibitor) subunit 13 like  |
| Ahrr     | NM_009644    | Aryl-hydrocarbon receptor repressor                            |
| Ankrd15  | NM_181404    | Ankyrin repeat domain 15                                       |
| Htatip2  | NM_016865    | HIV-1 tat interactive protein 2, homolog                       |
| Araf1    | NM_009703    | v-raf murine sarcoma 3611 viral oncogene homolog               |
| Twist2   | NM_007855    | Twist homolog 2                                                |
| Anxa8    | NM_013473    | Annexin A8                                                     |
| Creb3l2  | NM_178661    | cAMP responsive element binding protein 3-like 2               |
| D4st1    | NM_028117    | Dermatan 4 sulfotransferase 1                                  |
| Phf19    | NM_028716    | PHD finger protein 19                                          |
| Pp1201   | NM_027154    | Transmembrane BAX inhibitor motif containing 1 (Tmbim1)        |
| Arhgef1  | NM_008488    | Rho guanine nucleotide exchange factor (GEF) 1                 |
| Loc55974 | NM_009057    | Recombination activating gene 1 activating protein 1 (Rag1ap1) |
| F11R     | NM_172647    | F11 receptor                                                   |
| Arh      | NM_145554    | Low density lipoprotein receptor adaptor protein 1 (Ldlrap1)   |
| Parg1    | NM_172525    | Rho GTPase activating protein 29 (Arhgap29)                    |
| Smad5    | NM_008541    | MAD homolog 5                                                  |

|                       |           |                                                                                |
|-----------------------|-----------|--------------------------------------------------------------------------------|
| C3orf4                | NM_171826 | Claudin containing domain 1 (Cldnd1)                                           |
| Gnai3                 | NM_010306 | Guanine nucleotide binding protein, alpha inhibiting 3                         |
| Lmnb1                 | NM_010721 | Lamin B1                                                                       |
| MGC20741              | NM_198421 | USP49                                                                          |
| Ctgf                  | NM_010217 | Connective tissue growth factor                                                |
| Apex2                 | NM_029943 | Apurinic/aprimidinic endonuclease 2                                            |
| Gsn                   | NM_146120 | Gelsolin                                                                       |
| Pgm1                  | NM_028132 | Phosphoglucomutase 1                                                           |
| Zbed3                 | NM_028106 | Zinc finger, BED domain containing 3                                           |
| Ram2                  | NM_146040 | Cell division cycle associated 7 like                                          |
| Arpc1b                | NM_023142 | Actin related protein 2/3 complex, subunit 1B                                  |
| FLJ20273              | NM_178446 | 9530077J19Rik (BC013481); RNA-binding protein                                  |
| Eya4                  | NM_010167 | Eyes absent 4 homolog                                                          |
| Elovl1                | NM_019422 | Elongation of very long chain fatty acids (FEN1/Elo2, SUR4/Elo3, yeast)-like 1 |
| Snai2                 | NM_011415 | Snail homolog 2                                                                |
| Swap70                | NM_009302 | SWA-70 protein                                                                 |
| Cdca7                 | NM_025866 | Cell division cycle associated 7                                               |
| C14orf24              | NM_028527 | 1700047117Rik                                                                  |
| NS5ATP13TP2           | NM_178644 | D9Ucla1                                                                        |
| Cpne3                 | NM_027769 | Copine III                                                                     |
| TBDN100               | NM_053089 | NMDA receptor-regulated gene 1 (Narg1)                                         |
| Dnajc1                | NM_007869 | DnaJ (Hsp40) homolog, subfamily C, member 1                                    |
| Polr3g                | XM_283153 | Polymerase (RNA) III (DNA directed) polypeptide G                              |
| Cd59                  | NM_181858 | Cd59 antigen                                                                   |
| FLJ10420              | NM_025383 | NECAP endocytosis associated 2                                                 |
| Dctd                  | NM_178788 | dCMP deaminase                                                                 |
| Hspc135               | NM_025332 | GTP-binding protein 8 (putative)                                               |
| Tjp2                  | NM_011597 | Tight junction protein 2                                                       |
| Dffb                  | NM_007859 | DNA fragmentation factor, beta subunit                                         |
| Ifrd2                 | NM_025903 | Interferon-related developmental regulator 2                                   |
| Pldn                  | NM_019788 | Pallidin                                                                       |
| <b>NOT DETERMINED</b> |           |                                                                                |
| Ctnnd1                | NM_007615 | Catenin (cadherin associated protein), delta 1                                 |
| Nek6                  | NM_021606 | NIMA (never in mitosis gene a)-related expressed kinase 6                      |
| Apim2                 | NM_009678 | Adaptor-related protein complex 1, mu 2 subunit                                |
| FLJ25084              | XM_888129 | 2300003P22Rik                                                                  |
| C18orf37              | NM_172625 | D030070L09Rik                                                                  |
| MGC62100              | NM_146185 | 6330581L23Rik                                                                  |
| Kiaa0830              | NM_028013 | 2310067E08Rik; Endod1                                                          |
| Ssfa2                 | NM_080558 | Sperm specific antigen 2                                                       |
| MGC4083               | NM_026473 | Tubulin, beta 6                                                                |
| Cyp1b1                | NM_009994 | Cytochrome P450, family 1, subfamily b, polypeptide 1                          |
| FLJ20364              | NM_027411 | 2600001J17Rik                                                                  |
| Fam35a                | NM_029389 | 3110001K24Rik                                                                  |
| Cdk6                  | NM_009873 | Cyclin-dependent kinase 6                                                      |
| Usp48                 | XM_485461 | Similar to ubiquitin specific protease 48                                      |
| Mtmr6                 | NM_144843 | Myotubularin related protein 6                                                 |
| Slc15a4               | NM_133895 | Solute carrier family 15, member 4                                             |
| Elf4                  | NM_019680 | E74-like factor 4 (ets domain transcription factor)                            |
| Uhrf1                 | NM_010931 | Ubiquitin-like, containing PHD and RING finger domains, 1                      |
| Serpinh6              | NM_009254 | Serine (or cysteine) peptidase inhibitor, clade B, member 6a                   |
| FN5                   | NM_133214 | FN5 protein (BC017612)                                                         |
| Rassf5                | NM_018750 | Ras association (RalGDS/AF-6) domain family 5                                  |
| Stom                  | NM_013515 | Stomatin                                                                       |
| FLJ21924              | XM_130565 | 4732486I23Rik; Qser1                                                           |
| Nfic                  | NM_008688 | Nuclear factor I/C                                                             |
| TTC7A                 | NM_028639 | Tetratricopeptide repeat domain                                                |
| Dhcr24                | NM_053272 | 24-dehydrocholesterol reductase                                                |
| Ankrd27               | NM_145633 | Ankyrin repeat domain 27 (VPS9 domain)                                         |

|               |                    |                                                          |
|---------------|--------------------|----------------------------------------------------------|
| Katna1        | NM_011835          | Katanin p60 (ATPase-containing) subunit A1               |
| Tarbp1        | ENSMUST00000046393 | Tar (HIV-1) RNA binding protein 1                        |
| Sp1           | NM_013672          | Trans-acting transcription factor 1                      |
| Rbms1         | NM_020296          | RNA binding motif, single stranded interacting protein 1 |
| C10orf56      | XM_484355          | 2310047A01Rik                                            |
| Actr8         | NM_027493          | ARP8 actin-related protein 8 homolog                     |
| Osbpl8        | NM_175489          | Oxysterol binding protein-like 8, isoform a              |
| Gng10         | NM_025277          | Guanine nucleotide binding protein (G protein), gamma 10 |
| Trim29        | NM_023655          | Tripartite motif protein 29                              |
| C2orf12       | NO HOMOLOGUE       |                                                          |
| Contig3845_RC | NO HOMOLOGUE       |                                                          |
| Hic           | NO HOMOLOGUE       |                                                          |
| Loc116064     | NO HOMOLOGUE       |                                                          |
| Loc339924     | NO HOMOLOGUE       |                                                          |
| Stx10         | NO HOMOLOGUE       | syntaxin 10                                              |
