# Supplementary material
Source: PubMed Central journal article supplement (PMC2148283)
Supplement: pnas_0709971104_6.pdf [file pnas_0709971104_6.pdf]

**Table 3. Oligonucleotide sequences used in the study**

| <b>miRNA expression construct</b>                         | <b>Forward</b>                                                   | <b>Reverse</b>                      |
|-----------------------------------------------------------|------------------------------------------------------------------|-------------------------------------|
| miR-124a-3 precursor                                      | ATTGTGCAACAAGAAGCTGGAGCATTTCG                                    | TCTAATCTAGAGCATTGTTCCGCCGATTGTGC    |
| <b>miRNA duplexes and 2'O-methyl oligoribonucleotides</b> |                                                                  |                                     |
|                                                           | <b>Sense</b>                                                     | <b>Antisense</b>                    |
| let-7                                                     | UGAGGUAGUAGGUUGUAUAGU                                            | UAUACAACCUACUACCUCAGU               |
| GL3.1                                                     | CUUACGCUGAGUACUUCGAUU                                            | UCGAAGUACUCAGCGUAAGUU               |
| miR-124a duplex used in 293S experiments                  | UAAGGCACGCGGUGAAUGCCA                                            | GCAUUCACCGCGUGCCUUACA               |
| miR-124a duplex used in mouse cells                       | UAAGGCACGCGGUGAAUGCCA                                            | GCAUUCACCGCGUGCCUUAAU               |
| miR-124a mut5-6 (Lim et al, 2005)                         | UAAGGCACGCGGUGAAUGCCA                                            | GCAUUCACCGCGUGCCUUAAU               |
| miR-124a 2'OMe                                            | UGGCAUUCACCGCGUCCUUAA                                            |                                     |
| miR-1 2'OMe                                               | UACAUACUUCUUUACAUCCA                                             |                                     |
| <b>QPCR primers (mouse)</b>                               |                                                                  |                                     |
|                                                           | <b>Forward</b>                                                   | <b>Reverse</b>                      |
| miR-124a                                                  | CTCTGCGTGTTCACAGCGG                                              | CTCTTGGCATTACCCGCGTG                |
| REST                                                      | GCGGAAGACAAATGCAGGA                                              | TTCGGCTTCGTA CTGGCAA                |
| Ctdsp1                                                    | CACCGCATGGAGGACAGTGAGCC                                          | CACTCTGAGGTGCTCAGGTTC               |
| Vamp3                                                     | CACCGATGAAACTGAAGCCCAGATA                                        | TCCCAGCTAAATGCACAGAGAAGC            |
| GAPDH                                                     | AGAAGGTGGTGAAGCAGGCA                                             | CGAAGGTGGAAGAGTGGGAG                |
| Tubb3                                                     | GCGCCTTTGGACACCTATTCA                                            | CCGCGCCCTCCGTATAGTGC                |
| Nav1.2                                                    | GGCACAATCAGTGCTGGTACC                                            | CAGCAAGGGATTCCCTGGT                 |
| Celsr3                                                    | GACTCAGCAGGAAGTTGGACAAC                                          | GCTGTAACACTATGCAGGCCATC             |
| Nrxn2                                                     | CACAGATGACCTCCTGGTGGC                                            | GAGGGTCTAAGGAGTCTCCGTG              |
| NeuroD1                                                   | CAAGGTGGTACCTTGCTACTCC                                           | CGCAGGATCTCTGACAGAGC                |
| SNAP25                                                    | GAGCTGGAGGAGATGCAGAGG                                            | CTCTTCAACCAGCTGTAGCATGC             |
| <b>QPCR primers (human)</b>                               |                                                                  |                                     |
|                                                           | <b>Forward</b>                                                   | <b>Reverse</b>                      |
| Renilla luciferase                                        | CCAATGCTATTGTTGAAGGTGCCAAGAAG                                    | GTCATTTTTTGAGAACTCGCTCAACGAACG      |
| Firefly luciferase                                        | CGTCGCCAGTCAAGTAACAACC                                           | CACGGCGATCTTCCGCC                   |
| Ctdsp1                                                    | CCTGCCTCCTATGTCTTCCA                                             | GCCTGAGCACTGAGTACACG                |
| Plod3                                                     | GCGGTGATGAACTTTGTGG                                              | GGGAGGAGATCACACAGTCG                |
| Vamp3                                                     | GCAGCCAAGTTGAAGAGGAA                                             | CAGTTTTGAGTCCGCTGGT                 |
| □Actin                                                    | CGCGAGAAGATGACCCAGAT                                             | ACAGCCTGGATAGCAACGTACAT             |
| GAPDH                                                     | TGCACCACCAACTGCTTAGC                                             | GGCATGGACTGTGGTCAATGAG              |
| B2M                                                       | TGCTGTCTCCATGTTTGATGTATCT                                        | TCTCTGCTCCCCACCTCTAAGT              |
| GusB                                                      | CTCATTTGGAATTTTGCCGATT                                           | CCGAGTGAAGATCCCCTTTTTA              |
| RPLP0                                                     | GGCGACCTGGAAGTCCAAC                                              | CCATCAGCACCCACAGCCTTC               |
| <b>3'UTR site directed mutagenesis primers</b>            |                                                                  |                                     |
|                                                           | <b>Forward</b>                                                   | <b>Reverse</b>                      |
| Ctdsp1 (3' UTR)                                           | CCTGCTGGTGGAGGAAAATGG<br>CTTGGGCCCCGTGTGCACAAACTTCTTCCCCCTC      | GCTTGAAGGAGCTGTGCACC                |
| Ctdsp1 Δ7mer seed1                                        | C                                                                | GAGGGGAAGAAGTTTGTGACACAGGGGCCCAAG   |
| Ctdsp1 Δ7mer seed2                                        | GTTTTTGCTGCCCCGATTCCCCACCCAC<br>GAACAGTGGACACCCAATCATAGAACCCTCTT | GTGGGTGGGAATCCGGGGCAGCAAAAAC        |
| Ctdsp1 Δ7mer seed3                                        | TAC<br>CTAAACCCAGATGTCACCAGAGTATCAACAG                           | GTAAAGAGGGTTCTATGATTGGGTGTCCACTGTTC |
| Ctdsp1 Δ7mer seed4                                        | G<br>GATGACCTTCCCAATTAACCTGTGACCTGAG                             | CCTGTTGATACTCTGGTGACATCTGGGGTTTAG   |
| Ctdsp1 Δ7mer seed5                                        | CAC                                                              | GTGCTCAGGTCACAGAGTTAATTGGGAAGGTCATC |
| Ctdsp1 Δ6mer seed                                         | CAGCTCCTGGGTTTCTGTTTTTAAAGCCC                                    | GGGCTTTAAAAACAGGAAACCCAGGAGCTG      |
| Vamp3 (3' UTR)                                            | AATCGAAGACTCCAGCAGACAAAA                                         | AACACCTTATCCACATTGACTCTCAT          |

|                           |                                             |                                             |
|---------------------------|---------------------------------------------|---------------------------------------------|
| Vamp3 $\Delta$ 7mer seed1 | CAGTTTAGTGCCTAGAAAATTGTTTTTCATAT<br>ACACTCC | GGAGTGTATATGAAAAACAATTTTCTAGGCACTAAA<br>CTG |
| Vamp3 $\Delta$ 7mer seed2 | CTCCCCACATTTTGCACATACAGATTTCTGGA<br>CTG     | CAGTCCAGAAATCTGTATGTGCAAAATGTGGGGAG         |
| Vamp3 $\Delta$ 7mer seed3 | GGTGACAATAGCAGGGTATTTTGATAGCTAGG<br>AAAC    | GTTTCCTAGCTATCAAATACCCTGCTATTGTCACC         |
| Vamp3 $\Delta$ 6mer seed  | CAGATGTTGAAGATAGCCGCATCAGCCTAGG             | CCTAGGCTGATGCGGCTATCTTCAACATCTG             |
