# Supplementary material
Source: PubMed Central journal article supplement (PMC2148283)

293S

293S(hAgo1)

Control

3xBulge

Control

3xBulge

T |

T |

T |

T |

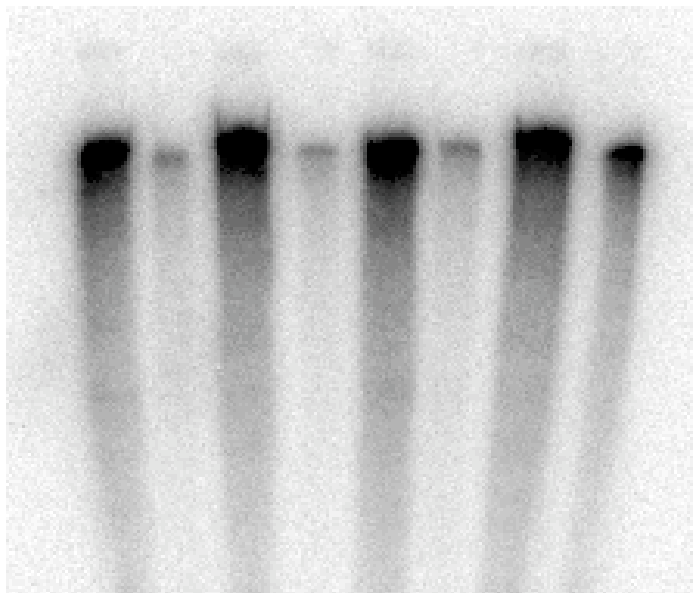

Supplement: pnas_0709971104_1.pdf [file pnas_0709971104_1.pdf]

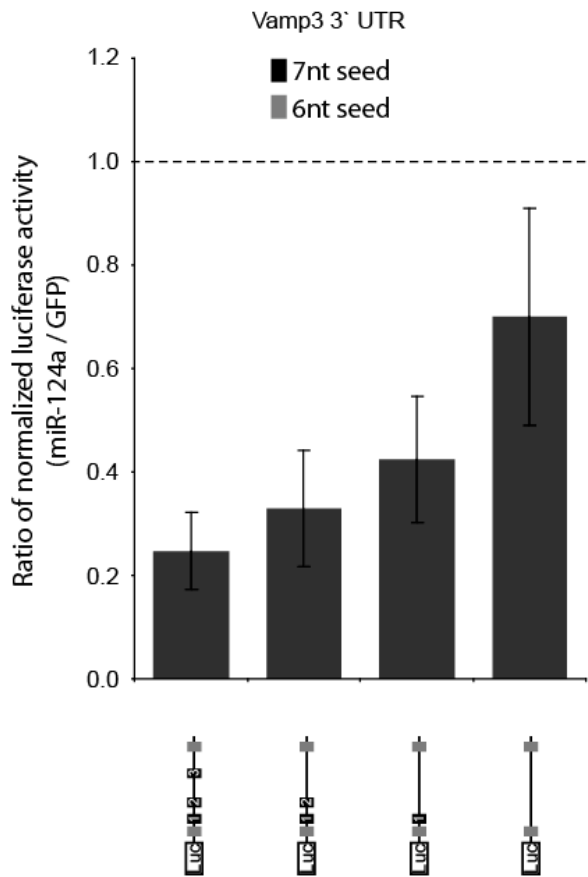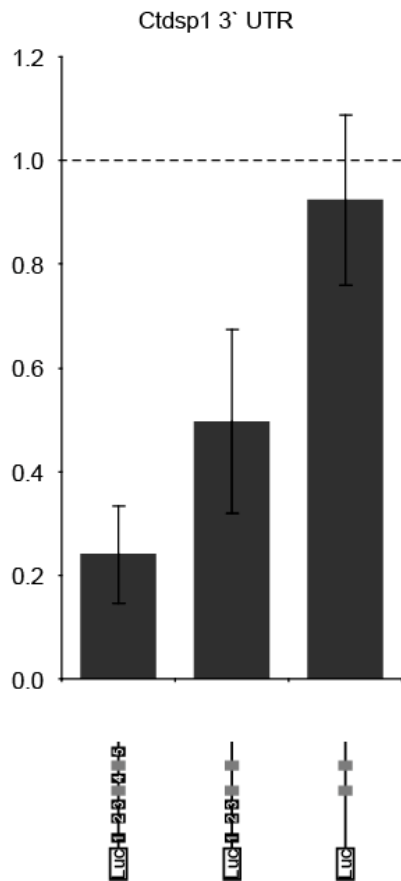

Supplement: pnas_0709971104_2.pdf [file pnas_0709971104_2.pdf]

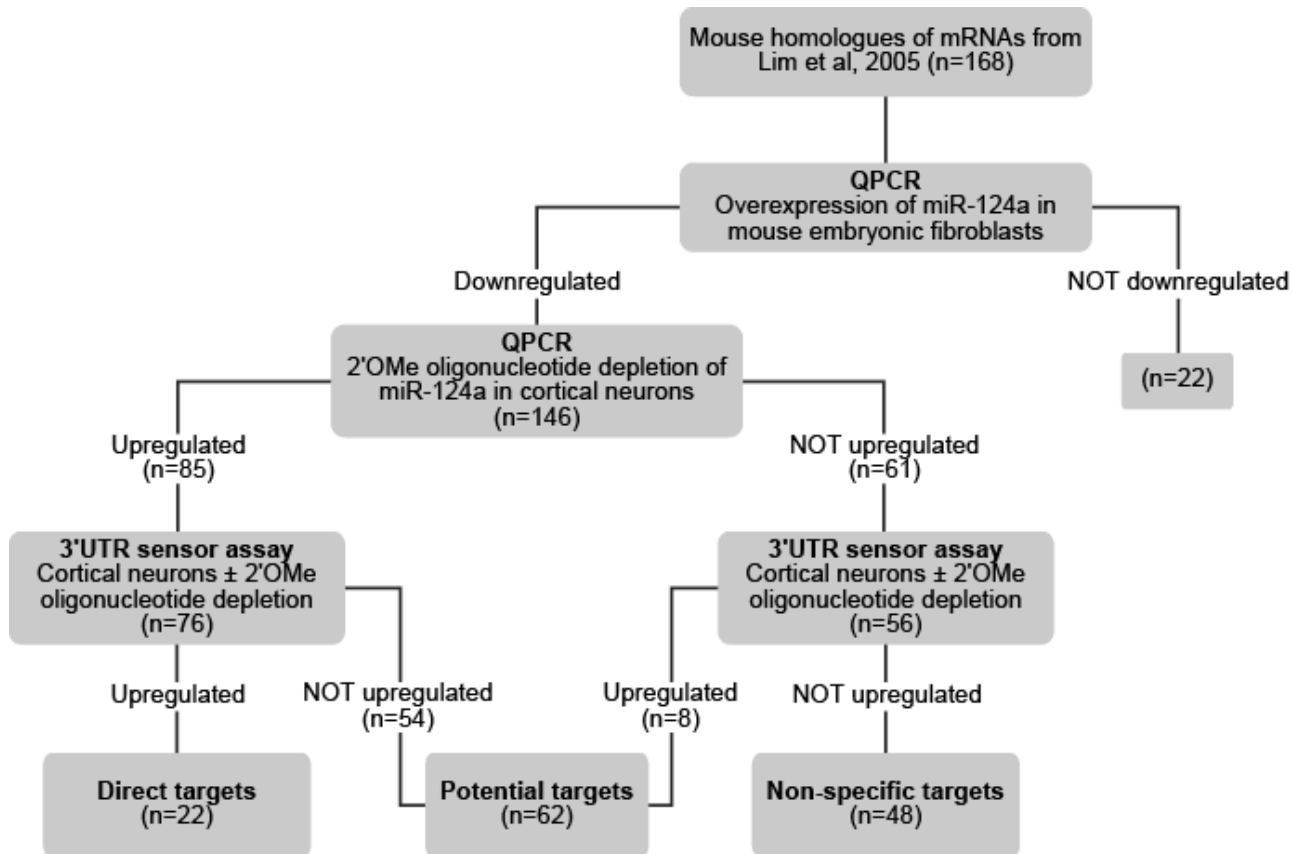

Supplement: pnas_0709971104_3.pdf [file pnas_0709971104_3.pdf]

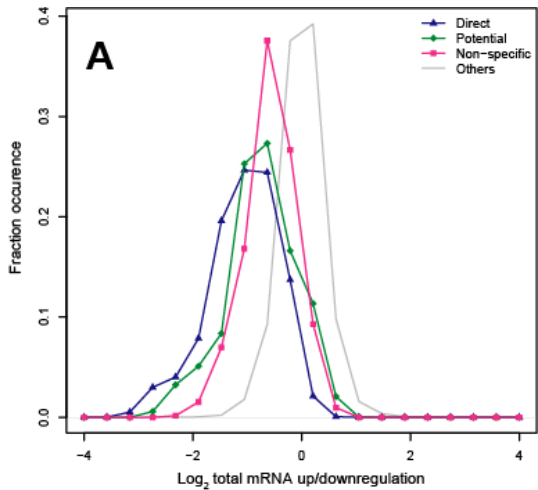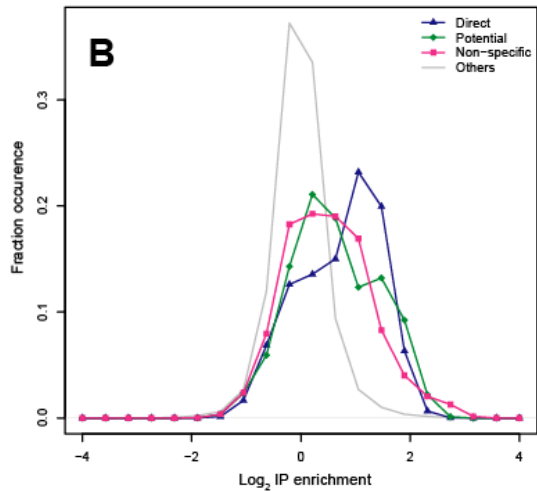

Supplement: pnas_0709971104_4.pdf [file pnas_0709971104_4.pdf]
